# Supplementary material
Source: PubMed Central journal article supplement (PMC3414900)
Supplement: mmc1.pdf [file mmc1.pdf]

# **Multi-Ion Distributions in the Cytoplasmic Domain of Inward Rectifier Potassium Channels**

J. L. Robertson,<sup>†‡</sup> L. G. Palmer,<sup>‡</sup> and B. Roux<sup>†</sup>

<sup>†</sup>Department of Biochemistry and Molecular Biology, University of Chicago, Chicago, Illinois; and

<sup>‡</sup>Department of Physiology and Biophysics, Weill Cornell Medical College, New York, New York

TABLE S1

| Channel     | Model | Ions                         | $Q_{\text{prot}}$ | Vol ( $\text{\AA}^3$ ) | $N_K$ | $N_{\text{Cl}}$ | $N_{\text{water}}$ | Time (ns) |
|-------------|-------|------------------------------|-------------------|------------------------|-------|-----------------|--------------------|-----------|
| Kir1.1/ROMK | 1     |                              |                   | 807131                 | 486   | 506             | 26011              | 12        |
|             | 2     | KCl                          | +20               | 848051                 | 510   | 530             | 27332              | 19        |
|             | 3     |                              |                   | 807280                 | 486   | 506             | 26016              | 17        |
| Kir2.1/IRK  | 1     |                              |                   | 811992                 | 512   | 488             | 26166              | 13        |
|             | 2     | KCl                          | -24               | 804171                 | 508   | 484             | 25912              | 15        |
|             | 3     |                              |                   | 810837                 | 512   | 488             | 26127              | 13        |
| Kir1.1/ROMK | 1     |                              |                   | 807130                 | 485   | 513             | 26003              | 20        |
|             | 2     | 4 $\text{Mg}^{2+}$<br>+ KCl  | +20               | 848051                 | 510   | 538             | 27324              | 21        |
|             | 3     |                              |                   | 807280                 | 486   | 514             | 26008              | 20        |
| Kir2.1/IRK  | 1     |                              |                   | 811992                 | 504   | 488             | 25912              | 19        |
|             | 2     | 4 $\text{Mg}^{2+}$<br>+ KCl  | -24               | 804171                 | 500   | 484             | 25913              | 18        |
|             | 3     |                              |                   | 810837                 | 504   | 488             | 26135              | 29        |
| Kir1.1/ROMK | 1     |                              |                   | 807131                 | 485   | 509             | 25983              | 19        |
|             | 2     | 1 $\text{SPM}^{4+}$<br>+ KCl | +20               | 848051                 | 510   | 534             | 27328              | 19        |
|             | 3     |                              |                   | 807280                 | 486   | 514             | 26008              | 20        |
| Kir2.1/IRK  | 1     |                              |                   | 811992                 | 508   | 488             | 26144              | 18        |
|             | 2     | 1 $\text{SPM}^{4+}$<br>+ KCl | -24               | 804171                 | 504   | 484             | 25916              | 19        |
|             | 3     |                              |                   | 810837                 | 508   | 488             | 26131              | 18        |
| Kir1.1/ROMK | 1     | 2 $\text{SPM}^{4+}$<br>+ KCl | +20               | 807130                 | 481   | 509             | 25956              | 10        |
| Kir2.1/IRK  | 1     | 2 $\text{SPM}^{4+}$<br>+ KCl | -24               | 811992                 | 504   | 488             | 26125              | 10        |
| Kir2.1/IRK  | 1U4F  | KCl                          | -28               | 943580                 | 596   | 568             | 30404              | 15        |

**Table S1.** Molecular dynamics simulation parameters. The volume is calculated as the number of water molecules before ion replacement \*  $29.89 \text{ \AA}^3$ .  $N_{\text{water}}$  represents the final number of water molecules after addition of ions.

TABLE S2

| PDB                 | Homologue                              | Species                                              | Resolution | Structural details                                                                                                                                                                                                                             |
|---------------------|----------------------------------------|------------------------------------------------------|------------|------------------------------------------------------------------------------------------------------------------------------------------------------------------------------------------------------------------------------------------------|
| 1N9P <sup>(1)</sup> | Kir3.1/GIRK1                           | <i>Mus musculus</i>                                  | 1.80 Å     | Isolated cytoplasmic domain with open G-loop gate.                                                                                                                                                                                             |
| 1P7B <sup>(2)</sup> | KirBac1.1                              | <i>Burkholderia pseudomallei</i>                     | 3.65 Å     | Full-length channel with closed helix-bundle gate and closed G-loop gate.                                                                                                                                                                      |
| 1U4E <sup>(3)</sup> | Kir3.1/GIRK1                           | <i>Mus musculus</i>                                  | 2.09 Å     | Isolated cytoplasmic domain with open G-loop gate                                                                                                                                                                                              |
| 1U4F <sup>(3)</sup> | Kir2.1/IRK1                            | <i>Mus musculus</i>                                  | 2.41 Å     | Isolated cytoplasmic domain with closed pore.                                                                                                                                                                                                  |
| 1XL4 <sup>(4)</sup> | KirBac3.1                              | <i>Magnetospirillum magnetotacticum</i>              | 2.60 Å     | Full-length channel with closed helix-bundle gate and open G-loop gate, possible Mg <sup>2+</sup> in selectivity filter .                                                                                                                      |
| 1XL6 <sup>(4)</sup> | KirBac3.1                              |                                                      | 2.85 Å     | Full-length channel with closed helix-bundle gate and open G-loop gate, possible Spermine <sup>4+</sup> in pore.                                                                                                                               |
| 2GIX <sup>(3)</sup> | Kir2.1/IRK1 + R218Q/T309K              | <i>Mus musculus</i>                                  | 2.02 Å     | Isolated cytoplasmic domain with closed G-loop gate and one ion density at the cytoplasmic entrance.                                                                                                                                           |
| 2QKS <sup>(5)</sup> | Prokaryotic Kir - Kir3.1/GIRK1 chimera | <i>Burkholderia xenovorans</i> – <i>Mus musculus</i> | 2.20 Å     | Full-length channel with two conformations in the unit cell: (i) helix-bundle gate closed and G-loop gate open, and (ii) helix-bundle gate intermediately open and G-loop gate closed. In (i), two ion densities are observed near the G-loop. |
| 2WLH <sup>(4)</sup> | KirBac3.1                              | <i>Magnetospirillum magnetotacticum</i>              | 3.28 Å     | Full-length channel with closed helix-bundle gate and open G-loop gate.                                                                                                                                                                        |
| 2WLI <sup>(4)</sup> | KirBac3.1                              |                                                      | 3.09 Å     | Full-length channel with intermediately open helix-bundle gate and open G-loop gate.                                                                                                                                                           |
| 2WLJ <sup>(4)</sup> | KirBac3.1                              |                                                      | 2.60 Å     | Re-refinement of 1XL4, possible Mg <sup>2+</sup> in selectivity filter and Spermine <sup>4+</sup> in cytoplasmic domain                                                                                                                        |
| 2WLK <sup>(4)</sup> | KirBac3.1                              |                                                      | 2.80 Å     | Re-refinement of 1XL6, possible Spermine <sup>4+</sup> in pore                                                                                                                                                                                 |
| 2WLL <sup>(4)</sup> | KirBac1.1                              | <i>Burkholderia pseudomallei</i>                     | 3.65 Å     | Re-refinement of 1P7B, possible Mg <sup>2+</sup> in selectivity filter                                                                                                                                                                         |
| 2WLM <sup>(4)</sup> | KirBac3.1                              | <i>Magnetospirillum magnetotacticum</i>              | 3.61 Å     | Full-length channel with closed helix-bundle gate and open G-loop gate.                                                                                                                                                                        |
| 2WLN <sup>(4)</sup> | KirBac3.1                              |                                                      | 3.44 Å     | Full-length channel with closed helix-bundle gate and open G-loop gate.                                                                                                                                                                        |
| 2WLO <sup>(4)</sup> | KirBac3.1                              |                                                      | 4.04 Å     | Full-length channel with intermediately open helix-bundle gate and open G-loop gate.                                                                                                                                                           |
| 2X6A <sup>(4)</sup> | KirBac3.1 + Q170A                      |                                                      | 3.10 Å     | Full-length channel with closed helix-bundle gate and open G-loop gate.                                                                                                                                                                        |
| 2X6B <sup>(4)</sup> | KirBac3.1 +                            |                                                      | 3.30 Å     | Full-length channel with closed helix-                                                                                                                                                                                                         |

**SUPPORTING INFORMATION - Robertson J. L. et al.**

|                     |                                                     |                      |                     |                                                                                                                                                                                                              |
|---------------------|-----------------------------------------------------|----------------------|---------------------|--------------------------------------------------------------------------------------------------------------------------------------------------------------------------------------------------------------|
|                     | Q170A                                               |                      |                     | bundle gate and open G-loop gate. Anomalous Ba <sup>2+</sup> signal in selectivity filter                                                                                                                    |
| 2X6C <sup>(4)</sup> | KirBac3.1 + Q170A                                   |                      | 2.70 Å              | Full-length channel with closed helix-bundle gate and open G-loop gate. Anomalous Sm <sup>3+</sup> signal in cytoplasmic domain.                                                                             |
| 3JYC <sup>(6)</sup> | Kir2.2/IRK2                                         | <i>Gallus gallus</i> | 3.1 Å               | Full-length channel with closed helix-bundle gate and intermediately open G-loop gate.                                                                                                                       |
| 3K6N <sup>(7)</sup> | Kir3.1/GIRK1 + S225E                                | <i>Mus musculus</i>  | 2.0 Å               | Isolated cytoplasmic domain with open G-loop gate. Five ion densities observed inside the pore.                                                                                                              |
| 3SPC <sup>(8)</sup> | Kir2.2/IRK2 + PPA (PIP <sub>2</sub> head-group)     | <i>Gallus gallus</i> | 2.45 Å              | Full-length channel with closed helix-bundle gate and intermediately open G-loop gate.                                                                                                                       |
| 3SPG <sup>(8)</sup> | Kir2.2/IRK2 + R186A + PIP <sub>2</sub>              |                      | 2.61 Å              | Full-length channel with closed helix-bundle gate and closed G-loop gate.                                                                                                                                    |
| 3SPH <sup>(8)</sup> | Kir2.2/IRK2 + I223L + PIP <sub>2</sub>              |                      | 3.00 Å              | Full-length channel with closed helix-bundle gate and closed G-loop gate.                                                                                                                                    |
| 3SPI <sup>(8)</sup> | Kir2.2/IRK2 + PIP <sub>2</sub> (short chain analog) |                      | 3.31 Å              | Full-length channel with closed helix-bundle gate and closed G-loop gate.                                                                                                                                    |
| 3SPJ <sup>(8)</sup> | Kir2.2/IRK2 + I223L                                 |                      | 3.31 Å              | Full-length channel with closed helix-bundle gate and closed G-loop gate.                                                                                                                                    |
| 3SYA <sup>(9)</sup> | Kir3.2/GIRK2 + PIP <sub>2</sub>                     |                      | <i>Mus musculus</i> | 2.98 Å                                                                                                                                                                                                       |
| 3SYC <sup>(9)</sup> | Kir3.2/GIRK2 + D228N                                | 3.41 Å               |                     | Full-length channel with closed helix-bundle gate and closed G-loop gate.                                                                                                                                    |
| 3SYO <sup>(9)</sup> | Kir3.2/GIRK2                                        | 3.54 Å               |                     | Full-length channel with intermediately open helix-bundle gate and closed G-loop gate.                                                                                                                       |
| 3SYP <sup>(9)</sup> | Kir3.2/GIRK2 + R201A                                | 3.12 Å               |                     | Full-length channel with closed helix-bundle gate and open G-loop gate.                                                                                                                                      |
| 3SYQ <sup>(9)</sup> | Kir3.2/GIRK2 + R201A + PIP <sub>2</sub>             | 3.44 Å               |                     | Full-length channel with two opposing subunits in different conformations: (i) intermediately open helix-bundle gate and open G-loop gate, and (ii) intermediately open helix-bundle and closed G-loop gate. |

**Table S2. Comparison of x-ray crystal structures of Kir channels.** Structures are listed according to date of entry into the PDB. For the the conformation of the gates, open describes a pore radii greater than 6 Å, intermediately-open 3-5 Å, and closed < 3 Å, based on radii calculations in Supplementary Figures 2-5.

TABLE S3

|                                | Kir Bac 1.1 (1P7B*) | Kir Bac 1.1 (open model) | Kir3.1 GIRK1 (1N9P) | Kir2.1 IRK1 (1U4F) | Kir Bac 3.1 (2WLI) | Kir2.2 IRK (3JYC) | Kir3.2 GIRK2 (3SYQ open model) | Kir1.1 ROMK1 (open model) | Kir2.1 IRK1 (open model) |
|--------------------------------|---------------------|--------------------------|---------------------|--------------------|--------------------|-------------------|--------------------------------|---------------------------|--------------------------|
| KirBac 1.1 (1P7B*)             |                     | 1.9 Å                    | 3.1 Å               | 3.2 Å              | 3.0 Å              | 3.3 Å             | 3.2 Å                          | 2.4 Å                     | 2.5 Å                    |
| KirBac 1.1 (open model)        |                     |                          | 3.3 Å               | 3.5 Å              | 3.4 Å              | 3.5 Å             | 3.7 Å                          | 1.8 Å                     | 2.0 Å                    |
| Kir3.1 GIRK1 (1N9P)            |                     |                          |                     | 1.6 Å              | 2.8 Å              | 1.8 Å             | 1.6 Å                          | 3.7 Å                     | 3.8 Å                    |
| Kir2.1 IRK1 (1U4F)             |                     |                          |                     |                    | 2.8 Å              | 0.8 Å             | 1.2 Å                          | 3.8 Å                     | 3.9 Å                    |
| KirBac 3.1 (2WLI)              |                     |                          |                     |                    |                    | 2.8 Å             | 2.7 Å                          | 3.7 Å                     | 3.7 Å                    |
| Kir2.2 IRK (3JYC)              |                     |                          |                     |                    |                    |                   | 1.5 Å                          | 3.8 Å                     | 3.9 Å                    |
| Kir3.2 GIRK2 (3SYQ open model) |                     |                          |                     |                    |                    |                   |                                | 3.9 Å                     | 3.9 Å                    |
| Kir1.1 ROMK1 (open model #1)   |                     |                          |                     |                    |                    |                   |                                |                           | 1.6 Å                    |
| Kir2.1 IRK1 (open model #1)    |                     |                          |                     |                    |                    |                   |                                |                           |                          |

**Table S3.** RMSD of Ca atoms of a single subunit of cytoplasmic domain crystal structures and models. Regions containing insertions or deletions were removed from the alignment. Residues were aligned using the RMSD calculator in VMD. (\*) For 1P7B, missing loops were built based on homology with the Kir3.1/GIRK structure 1N9P prior to alignment.

FIG. S1

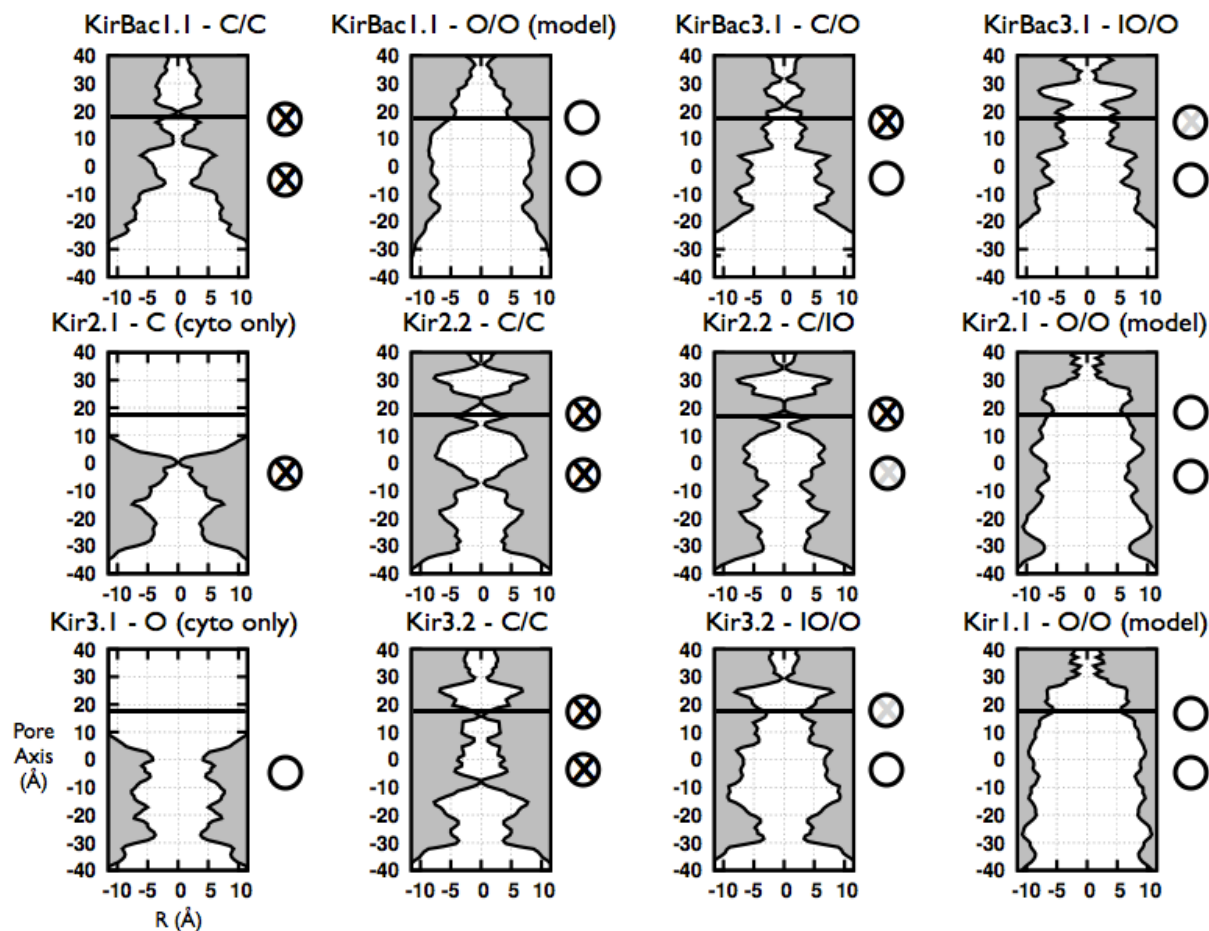

**Figure S1. Calculated pore radius profiles for Kir crystals structures and homology models.** For each, the structure was aligned onto the Z-axis, referred to as the Pore Axis (Å). The solid black line designates the lower membrane interface, where the helix-bundle gate is positioned. The G-loop gate is positioned at 0 Å. The gates are described as closed (C-blocked circle), open (O-open circle) and intermediate open (IO-grey blocked circle). KirBac1.1 – C/C (1P7B with loops built from 1N9P), KirBac1.1 – O/O (model based on KirBac3.1 electron crystallography density map), KirBac3.1 – C/O (2WLH), KirBac3.1 – IO/O (2WLI), Kir2.1 – C (cytoplasmic domain only 1U4F), Kir2.2 – C/C (3SPJ), Kir2.2 – C/O (3JYC), Kir2.1 – O/O (model), Kir3.1 – O (cytoplasmic domain only 1N9P), Kir3.2 – C/C (3SYC), Kir3.2 – IO/O (3SYQ, open model), Kir1.1 – O/O (model). Radii are calculated according to previously described methods (10).

FIG. S2

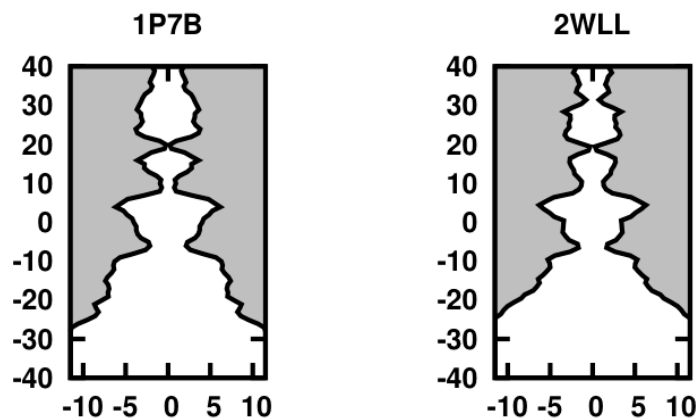

**Figure S2. Calculated pore radius profiles for KirBac1.1 pdb structures.** The pore axis is vertical, and the radius is horizontal, both are in Å. The G-loop is positioned at 0 Å, with the transmembrane domain  $> 0$  Å and cytoplasmic domain  $< 0$  Å. The pdb codes are labeled above each plot. Radii are calculated according to previously described methods (10).

FIG. S3

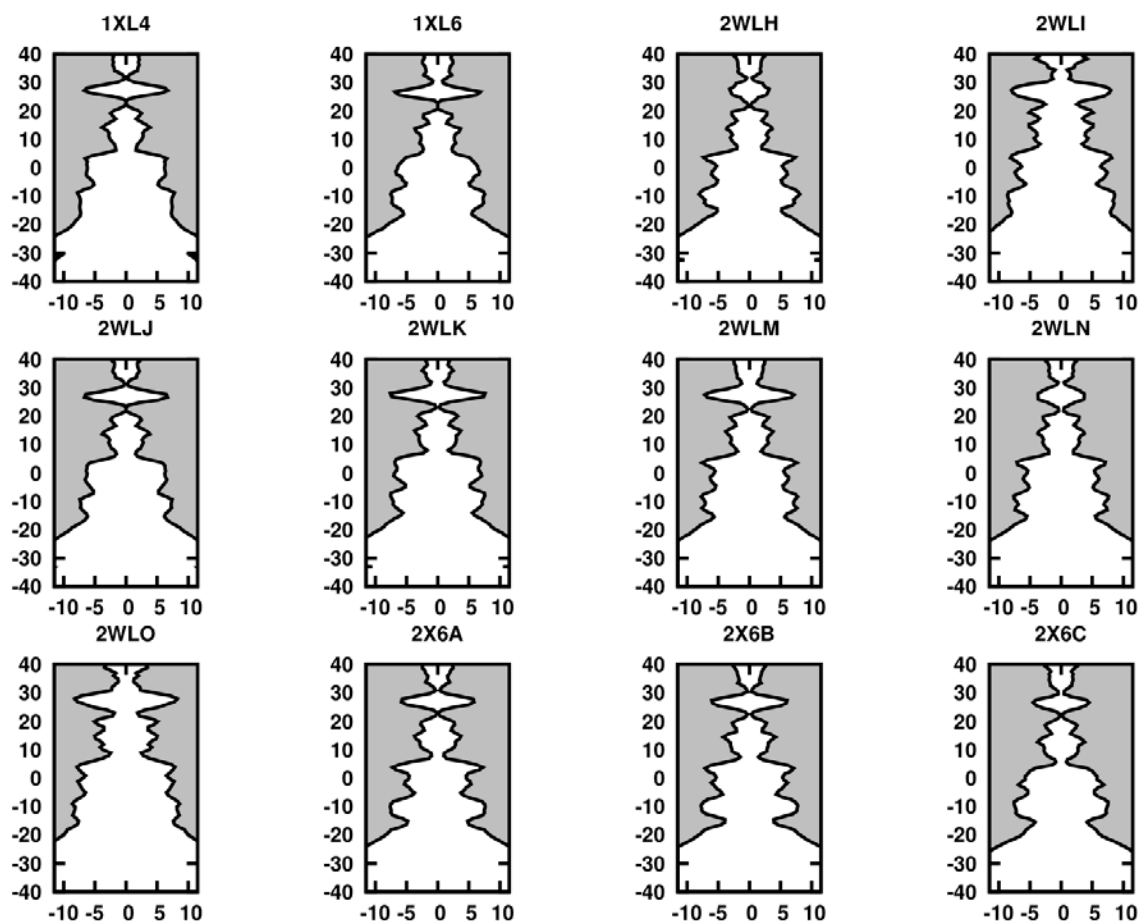

**Figure S3. Calculated pore radius profiles for KirBac3.1 pdb structures.** The pore axis is vertical, and the radius is horizontal, both are in Å. The G-loop is positioned at 0 Å, with the transmembrane domain > 0 Å and cytoplasmic domain < 0 Å. The pdb codes are labeled above each plot. Radii are calculated according to previously described methods (10).



FIG. S4

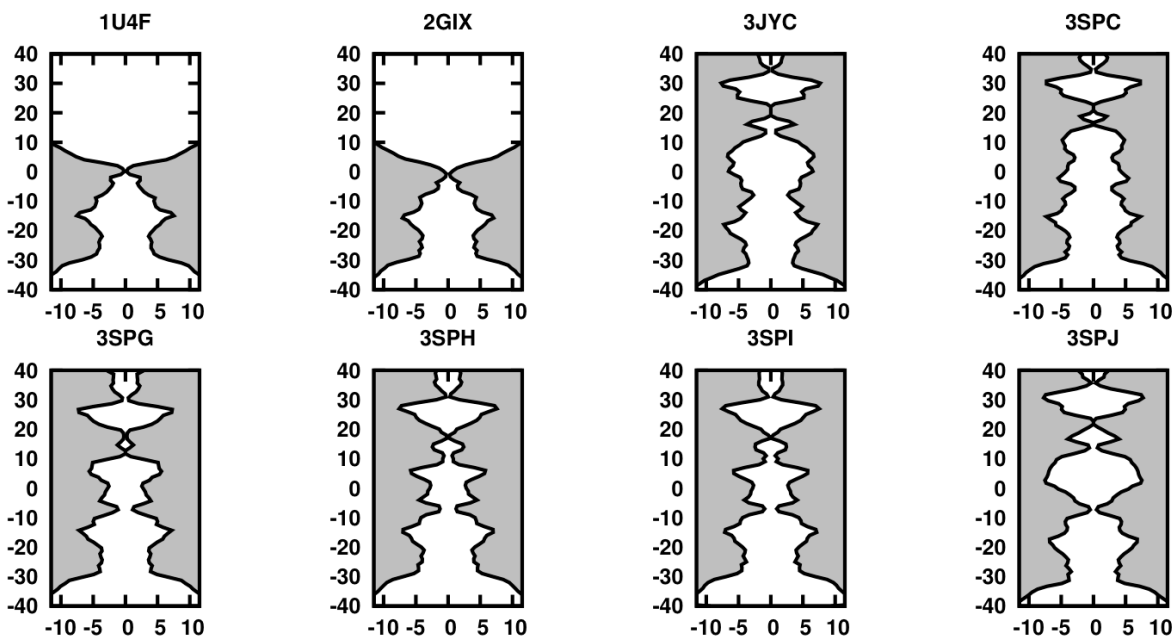

**Figure S4. Calculated pore radius profiles for Kir2.x pdb structures.** The pore axis is vertical, and the radius is horizontal, both are in Å. The G-loop is positioned at 0 Å, with the transmembrane domain  $> 0$  Å and cytoplasmic domain  $< 0$  Å. The pdb codes are labeled above each plot. Radii are calculated according to previously described methods (10).

FIG. S5

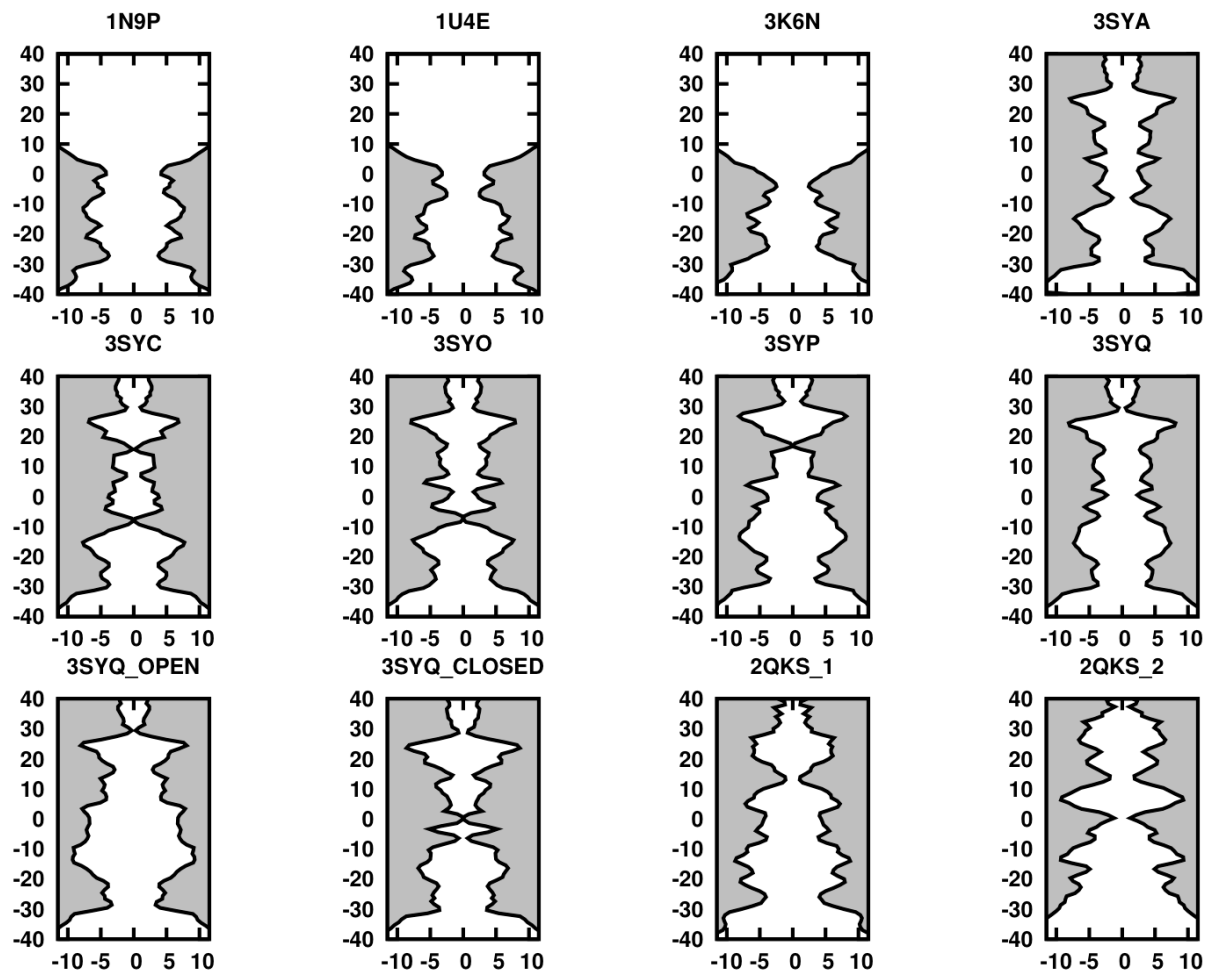

**Figure S5. Calculated pore radius profiles for Kir3.x pdb structures.** The pore axis is vertical, and the radius is horizontal, both are in Å. The G-loop is positioned at 0 Å, with the transmembrane domain > 0 Å and cytoplasmic domain < 0 Å. The pdb codes are labeled above each plot. Pdb 2QKS is of a KirBac-Kir3.1 chimera. Radii are calculated according to previously described methods (10).

FIG. S6

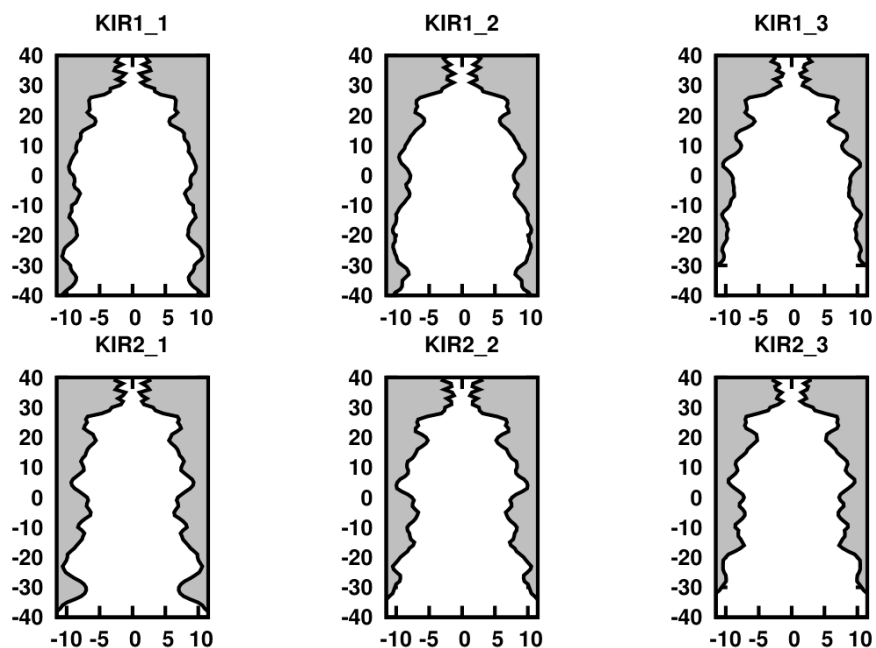

**Figure S6. Calculated pore radius profiles for models of Kir1.1 and Kir2.1 based on the open model of KirBac1.1.** The pore axis is vertical, and the radius is horizontal, both are in Å. The G-loop is positioned at 0 Å, with the transmembrane domain > 0 Å and cytoplasmic domain < 0 Å. Three separate models were generated based on different starting sequence alignments for each channel type. Radii are calculated according to previously described methods (10).

FIG. S7

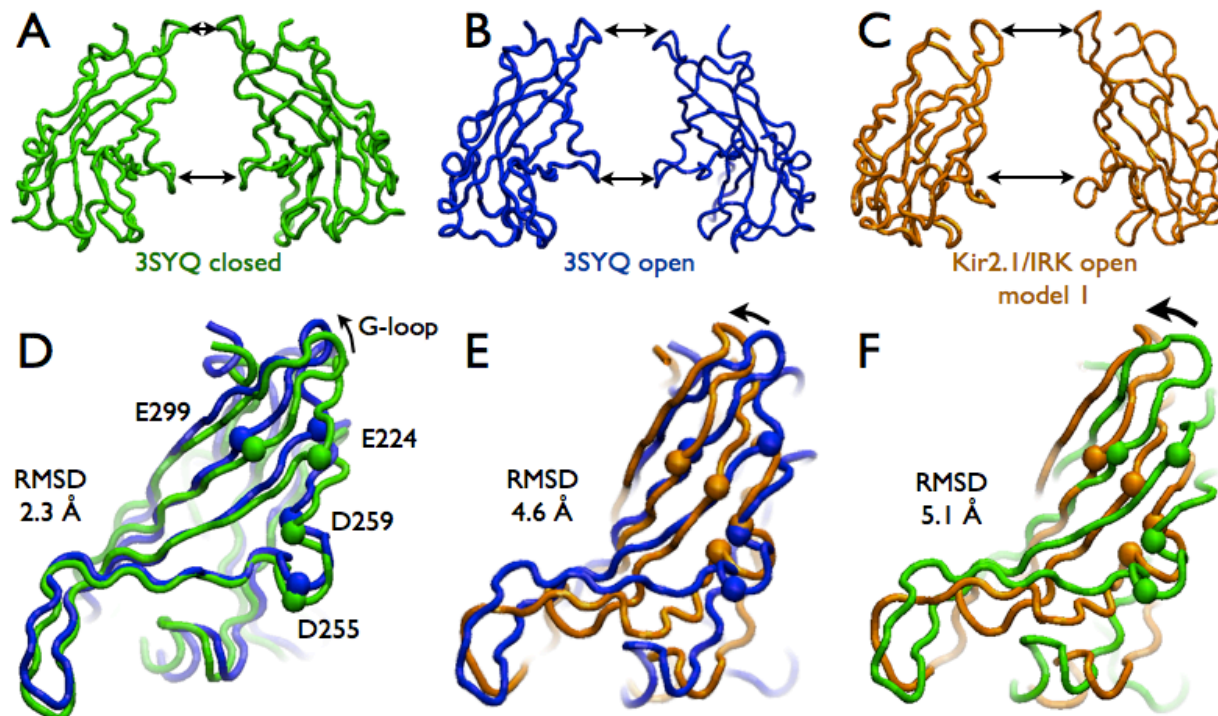

**Figure S7. Comparison of Kir2.1/IRK homology model with the x-ray crystal structure of Kir3.2/GIRK2 in multiple conformations.** X-ray structure of Kir3.2/GIRK2, pdb code 3SYQ, with opposing subunits of the cytoplasmic domain in different conformations(9). In the same crystal structure, they found two cytoplasmic subunits in the (A) closed state and two subunits bound to PIP<sub>2</sub> giving an open or partially open state (B). (C) A homology models of an open Kir2.1/IRK used in this study. The two subunits of the different structures are C<sub>α</sub> RMSD aligned onto one another, including the conformational change in the RMSD. (D) GIRK2-open (blue) on GIRK2-closed (green), with a RMSD of 2.3 Å. The C<sub>α</sub> atoms for residues corresponding to E224, D255, D259 and E299 in Kir2.1/IRK, are shown as spheres in each of the models. The G-loop upper gate is labeled. (E) Kir2.1/IRK-open (orange) onto GIRK2-open (blue) with RMSD of 4.6 Å. (F) Kir2.1/IRK-open (orange) onto GIRK2-closed (green) with RMSD 5.1 Å.

FIG. S8

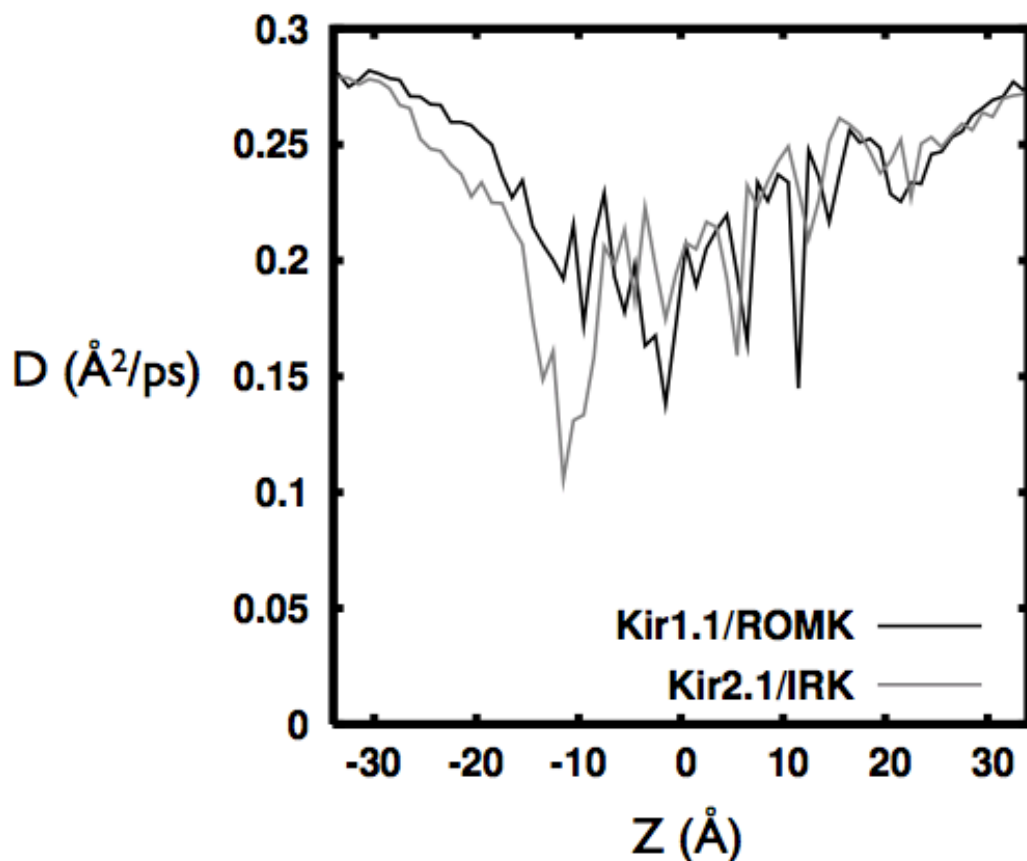

**Figure S8.** Calculated diffusion constant of  $K^+$  inside the cytoplasmic pore of **Kir1.1/ROMK** and **Kir2.1/IRK**. To determine the diffusion constant profile, trajectory data was filtered to select only data where the ion resides inside the cytoplasmic pore defined from  $-35 \text{ \AA} < Z < 35 \text{ \AA}$  and  $R < 20 \text{ \AA}$ . Then, for each  $Z$  position, the diffusion constant was calculated using the equation  $D = \langle [\Delta Z(t) - \langle \Delta Z(t) \rangle]^2 \rangle / 2\tau$ , where  $\Delta Z(t) = Z(t+\tau) - Z(t)$  and  $\tau = 1 \text{ ps}$  (11). The profiles demonstrate a decrease in ion diffusion inside the cytoplasmic pore. The experimental diffusion constant of  $K^+$  is  $0.185 \text{ \AA}^2/\text{ps}$  (12), however it is well documented that the diffusion of  $K^+$  in these simulations is over-estimated because the TIP3 water model itself produces a diffusion constant twice that of experimental values (13, 14). The bulk values in these calculations correspond to other molecular dynamics simulations at 1 M KCl at comparable temperatures (11). Note that a diffusion constant of  $0.1 \text{ \AA}^2/\text{ps}$  corresponds to  $10^{-5} \text{ cm}^2/\text{s}$ .

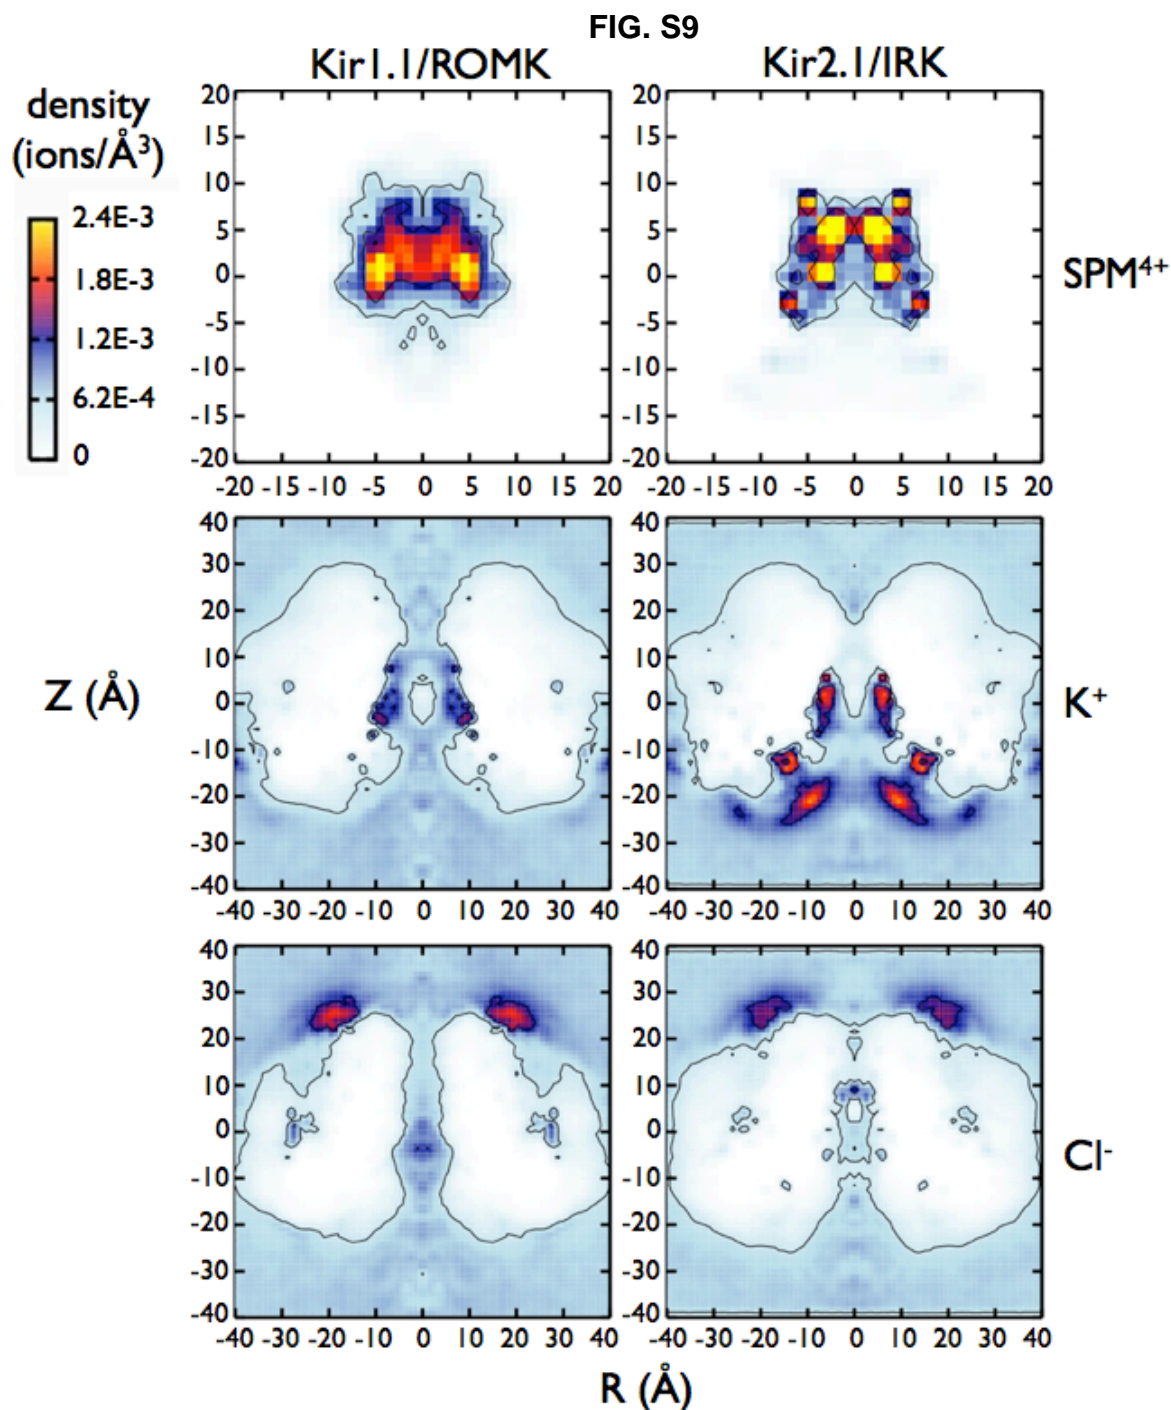

**Figure S9. Average SPM<sup>4+</sup>, K<sup>+</sup> and Cl<sup>-</sup> density distributions.** The density for spermine is calculated using the four nitrogen atoms (N<sub>1</sub>, N<sub>2</sub>, N<sub>3</sub>, N<sub>4</sub>). A molecular density of  $\rho = 6.022 \times 10^{-4}$  ions/Å<sup>3</sup> corresponds to 1 M concentration. Contours are shown for densities corresponding to 1 and 2.5 M. Note that while K<sup>+</sup> and Cl<sup>-</sup> adequately sample the system space and converge to 1 M in the bulk, the SPM<sup>4+</sup> molecule remains mostly in the pore throughout the simulations.

SUPPLEMENTARY REFERENCES

1. Nishida M, MacKinnon R. 2002. Structural basis of inward rectification: cytoplasmic pore of the G protein-gated inward rectifier GIRK1 at 1.8 Å resolution. *Cell* 111: 957-65
2. Kuo A, Gulbis JM, Antcliff JF, Rahman T, Lowe ED, et al. 2003. Crystal structure of the potassium channel KirBac1.1 in the closed state. *Science* 300: 1922-6
3. Pegan S, Arrabit C, Zhou W, Kwiatkowski W, Collins A, et al. 2005. Cytoplasmic domain structures of Kir2.1 and Kir3.1 show sites for modulating gating and rectification. *Nat Neurosci* 8: 279-87
4. Clarke OB, Caputo AT, Hill AP, Vandenberg JI, Smith BJ, Gulbis JM. 2010. Domain reorientation and rotation of an intracellular assembly regulate conduction in Kir potassium channels. *Cell* 141: 1018-29
5. Nishida M, Cadene M, Chait BT, MacKinnon R. 2007. Crystal structure of a Kir3.1-prokaryotic Kir channel chimera. *Embo J* 26: 4005-15
6. Tao X, Avalos JL, Chen J, MacKinnon R. 2009. Crystal structure of the eukaryotic strong inward-rectifier K<sup>+</sup> channel Kir2.2 at 3.1 Å resolution. *Science* 326: 1668-74
7. Xu Y, Shin HG, Szep S, Lu Z. 2009. Physical determinants of strong voltage sensitivity of K(+) channel block. *Nat Struct Mol Biol* 16: 1252-8
8. Hansen SB, Tao X, MacKinnon R. Structural basis of PIP<sub>2</sub> activation of the classical inward rectifier K<sup>+</sup> channel Kir2.2. *Nature* 477: 495-8
9. Whorton MR, MacKinnon R. Crystal structure of the mammalian GIRK2 K<sup>+</sup> channel and gating regulation by G proteins, PIP<sub>2</sub>, and sodium. *Cell* 147: 199-208
10. Jogini V, Roux B. 2005. Electrostatics of the intracellular vestibule of K<sup>+</sup> channels. *J Mol Biol* 354: 272-88
11. Im W, Roux B. 2002. Ions and counterions in a biological channel: a molecular dynamics simulation of OmpF porin from Escherichia coli in an explicit membrane with 1 M KCl aqueous salt solution. *J Mol Biol* 319: 1177-97
12. Mills R and Lobo VM. 1989. Self-Diffusion in Electrolyte Solutions—A Critical Examination of Data Compiled from the Literature, Elsevier, Amsterdam.
13. van der Spoel D, van Maaren PJ and Berendsen HJC. 1998. A systematic study of water models for molecular simulation: Derivation of water models optimized for use with a reaction field. *J Chem Phys* 108 pp. 10220-10230.
14. Mahoney WW and Jorgensen WL. 2001. Diffusion constant of the TIP5P model of liquid water. *J. Chem. Phys.*, 114, 363-366.
